# Supplementary material
Source: PubMed Central journal article supplement (PMC5014482)
Supplement: 31f0f140b4ecf10bb3104bb466a2c306_SI-warren_rev.pdf [file 31f0f140b4ecf10bb3104bb466a2c306_SI-warren_rev.pdf]

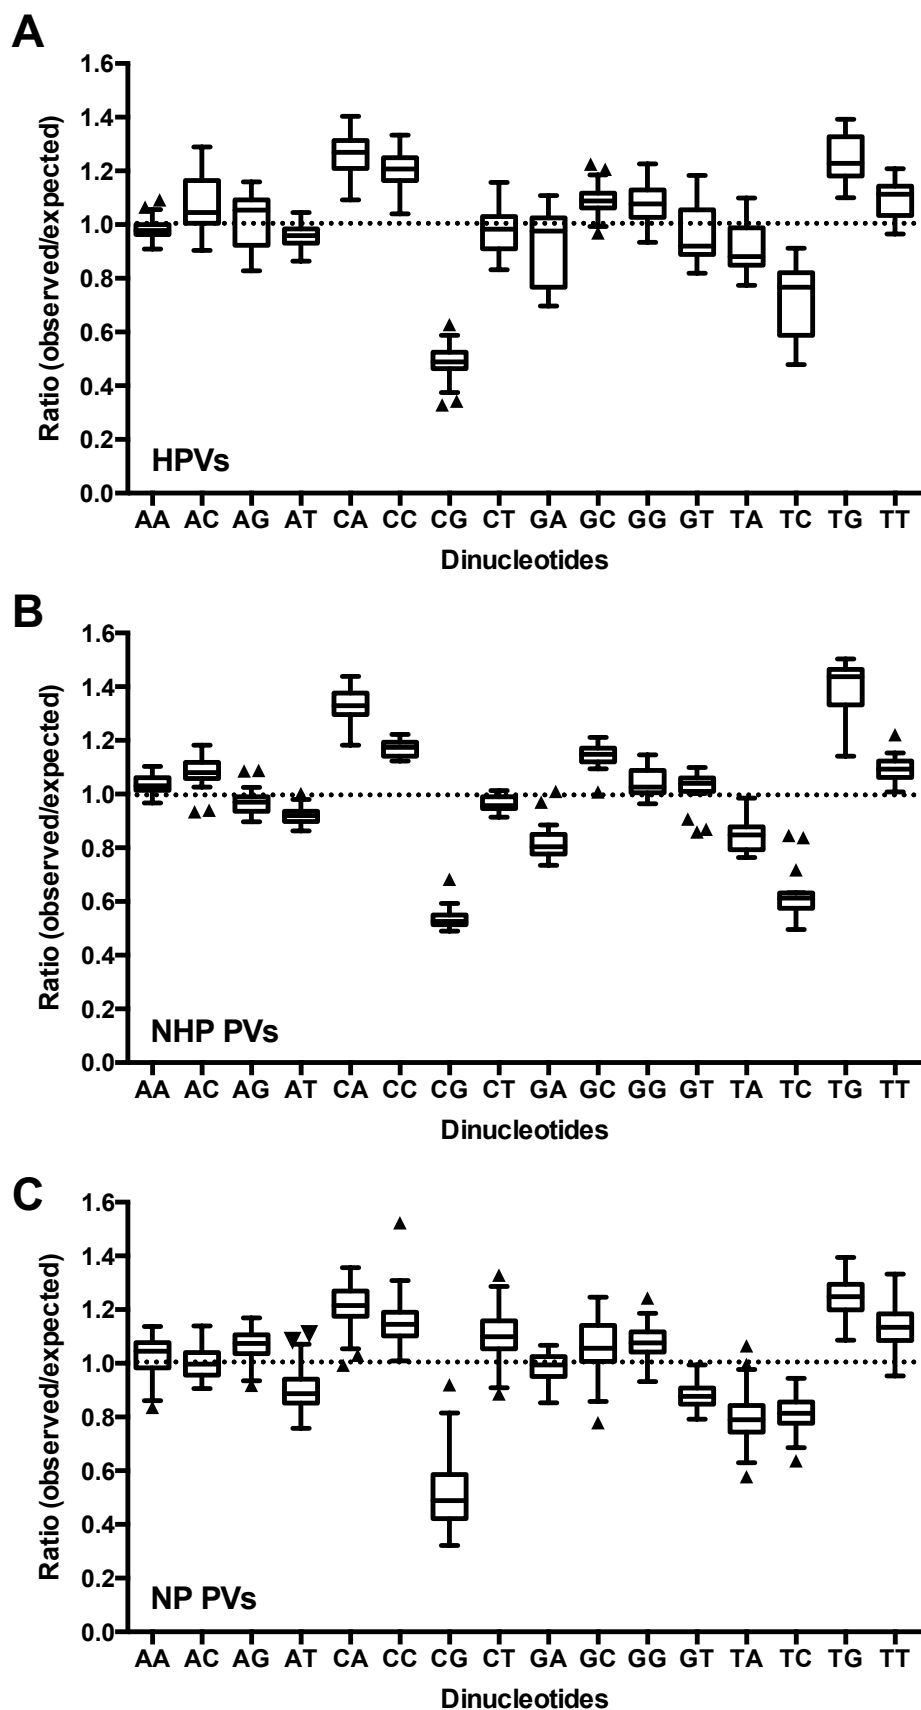

**S1 Figure. TC dinucleotide sequences are significantly depleted in PV genomes.** The O/E ratios of all dinucleotides in PV genome sequences were analyzed with genome sequences of HPVs (A,  $n = 161$ ), non-human primate (NHP) PVs (B,  $n = 16$ ), and non-primate (NP) PVs (C,  $n = 97$ ). Box-and-whisker plots are shown with the outliers (black triangles) identified using Tukey's method.
